# Supplementary material
Source: PubMed Central journal article supplement (PMC8444370)
Supplement: 12884_2021_4107_MOESM1_ESM.pdf [file 12884_2021_4107_MOESM1_ESM.pdf]

# QUESTIONNAIRE

1.1 Health facility \_\_\_\_\_

| No   | <b>1. Socio demographic status</b>                                                    |                                                                                                                                  |
|------|---------------------------------------------------------------------------------------|----------------------------------------------------------------------------------------------------------------------------------|
| 1.2. | Age of pregnant women                                                                 | 1. 15-19                      5.35-39<br>2.20-24                      6.40-44<br>3.25-29                      7.45-49<br>4.30-34 |
| 1.3. | Marital status:                                                                       | 1. Married    3. Divorced<br>2. Single     4. Widowed                                                                            |
| 1.4. | If married what is the highest level of schooling your husband/partner ever attended? | 1. Illiterate<br>2. Can read and write<br>3. Primary<br>4. Secondary<br>5. Diploma and above                                     |
| 1.5. | Educational status of pregnant women                                                  | 1. Illiterate<br>2. Can read and write<br>3. Primary<br>4. Secondary<br>5. Diploma and above                                     |
| 1.6. | Religion:                                                                             | 1. Orthodox                      3. Protestant<br>2. Muslim                        4. Other                                      |
| 1.7. | Ethnicity                                                                             | 1. Oromo     4. Guragie<br>2. Amhara   5. Somali<br>3. Tigrie     6. Other                                                       |
| 1.8. | Wealth index                                                                          | 1 lowest     4 fourth<br>2second     5 highest<br>3middle                                                                        |
| 1.9. | What is your occupation?                                                              | 1. House wife                      4. Student                                                                                    |

|       |                             |                                                                          |
|-------|-----------------------------|--------------------------------------------------------------------------|
|       |                             | 2. Civil servant      5. Farmer<br>3. Merchant          6. Other Specify |
| 1.10. | Total number of family size | 1 one                  3. Greater than three<br>2. Two                   |
| 1.11. | Do you have children?       | 1. Yes                      2.no                                         |

| <b>2. Obstetric condition</b> |                                                                                                      |                                                                                                           |
|-------------------------------|------------------------------------------------------------------------------------------------------|-----------------------------------------------------------------------------------------------------------|
| 2.1.                          | If yes question 1.10, does you has ANC follow up for the past pregnancy?                             | 1.yes                  2.no                                                                               |
| 2.2.                          | If yes Where do you received ANC?                                                                    | 1.Gov'thealthcenter    3.Privetclinic<br>2.Gov't hospital        4.Health post                            |
| 2.3.                          | If yes question no1.10, Where do you deliver your baby/s?                                            | 1.Gov't health center    4.Health post<br>2.Gov't hospital                      5.home<br>3.Privet clinic |
| 2.4.                          | What is the outcome?                                                                                 | 1.Good                  2.bad                                                                             |
| 2.5.                          | Is the current pregnancy planned/wanted/ supported?                                                  | 1.yes                  2.no                                                                               |
| 2.6.                          | Do you have ANC for this Pregnancy in other health facility?                                         | 1.Yes                  2.no                                                                               |
| 2.7.                          | Why do you prefer this facility?                                                                     | 1.accessable for transportation<br>2.affordeble<br>3.quality of service<br>4.no choice                    |
| 2.8.                          | Do you know benefit of ANC follow up?                                                                | 1.yes                  2.no                                                                               |
| 2.9.                          | If yes where do you get information about the benefit?                                               | 1. Health extension                  2.media<br>3.both      4. Relatives                                  |
| 2.10                          | Why pregnant mothers once start at health center not complete their follow up at that health center? | 1.lack of quality of service<br>2. lack of full investigation                                             |

|                                  |                                                                         |                                                                                             |
|----------------------------------|-------------------------------------------------------------------------|---------------------------------------------------------------------------------------------|
|                                  |                                                                         | 3. lack of professionals<br>4.other                                                         |
| <b>2.11.</b>                     | How many months pregnant when you first received ANC for the pregnancy? | 1. 1 <sup>st</sup> trimester<br>2.-2 <sup>nd</sup> trimester<br>3.3 <sup>rd</sup> trimester |
| <b>2.12.</b>                     | How many ANC visit for the current pregnancy?                           | 1. One<br>2.Two<br>3.three<br>4.four                                                        |
| <b>2.13.</b>                     | Why do you miss ANC follow up?                                          | 1. Lack of knowledge about ANC<br>2.Poor quality of the service<br>3.Others specify         |
| <b>3.Knowledge and awareness</b> |                                                                         |                                                                                             |
| <b>3.1.</b>                      | Do you think that the professional treat them respectfully?             | 1.yes      2.no                                                                             |
| <b>3.2.</b>                      | Do you think that they get advice on (nutrition complications etc)      | 1. Yes      2.no                                                                            |
| <b>3.3.</b>                      | Where do you need to deliver your baby?                                 | 1. Home<br>2. Public Health center<br>3. Privet clinic<br>4.Hospital                        |
| <b>4.Quality of service</b>      |                                                                         |                                                                                             |
| <b>4.1.</b>                      | Is there any time that you return back to your home without check up?   | 1. Yes<br>2.no                                                                              |
| <b>4.2.</b>                      | How many time do you spent                                              | 1. Less than 20 min<br>2. greater than 20                                                   |
| <b>4.3.</b>                      | .Are you satisfied with the service you received?                       | 1.yes      2.no                                                                             |
| <b>4.4.</b>                      | Do you gate all investigation that prescribes                           | 1. Yes      2. no                                                                           |
| <b>4.5.</b>                      | If yes how much you satisfied?                                          | 1. Good      2.poor                                                                         |
